# Supplementary material for: The association between a genetic variant in the SULF2 gene, metabolic parameters and vascular disease in patients at high cardiovascular risk
Source: PubMed Central journal article supplement — Cardiovasc Endocrinol Metab. 2023 Jan 18;12(1):e0278. doi: 10.1097/XCE.0000000000000278 (PMC9870215; doi:10.1097/xce.0000000000000278), 2023-01-18
Supplement: xce-12-e0278-s001.pdf [file xce-12-e0278-s001.pdf]

## Supplementary material

**Supplementary Table 1 – Definitions of CVD at baseline**

| <b>CVD at baseline</b>          | <b>Definition</b>                                                                                                                                                                                                                                                                              |
|---------------------------------|------------------------------------------------------------------------------------------------------------------------------------------------------------------------------------------------------------------------------------------------------------------------------------------------|
| Coronary artery Disease (CAD)   | <ul style="list-style-type: none"><li>- Myocardial infarction</li><li>- Angina pectoris</li><li>- Coronary stenosis in <math>\geq 1</math> major coronary artery</li><li>- Self-reported history of MI, cardiac arrest or revascularization</li></ul>                                          |
| Peripheral artery Disease (PAD) | <ul style="list-style-type: none"><li>- Fontaine stage of at least IIa (i.e. intermittent claudication and resting ankle-brachial index (ABI) <math>&lt;0.9</math> in at least one leg),</li><li>- Self-reported history of amputation or vascular surgery of the lower extremities.</li></ul> |
| Cerebrovascular Disease (CeVD)  | <ul style="list-style-type: none"><li>- Transient ischemic attack</li><li>- Ischemic stroke</li><li>- Amaurosis fugax</li><li>- Retinal infarction</li><li>- Self-reported stroke or carotid artery operation in the past.</li></ul>                                                           |
| Abdominal aortic aneurysm (AAA) | <ul style="list-style-type: none"><li>- Aneurysm of the abdominal aorta (distal aortic diameter <math>\geq 3</math> cm) during screening</li><li>- AAA surgery in the past.</li></ul>                                                                                                          |

**Supplementary Table 2 – Definitions of outcomes**

| <b>Outcome</b>                  | <b>Definition</b>                                                                                                                                                                                                                                                                                                                                                                                                                                                                                 |
|---------------------------------|---------------------------------------------------------------------------------------------------------------------------------------------------------------------------------------------------------------------------------------------------------------------------------------------------------------------------------------------------------------------------------------------------------------------------------------------------------------------------------------------------|
| Cardiovascular events           | <ul style="list-style-type: none"><li>- Nonfatal myocardial infarction</li><li>- Nonfatal stroke (ischemic/hemorrhagic)</li><li>- Retinal infarction/hemorrhage</li><li>- Vascular death (death from myocardial infarction, stroke, heart failure, or rupture of abdominal aortic aneurysm; vascular death from other causes; or sudden death (unexpected cardiac death occurring within 1 hour after onset of symptoms, or within 24 hours given convincing circumstantial evidence)).</li></ul> |
| Limb events                     | <ul style="list-style-type: none"><li>- Major amputation (at level of the foot or more proximal)</li><li>- Lower limb revascularization (vascular intervention or thrombolysis).</li></ul>                                                                                                                                                                                                                                                                                                        |
| Type 2 diabetes mellitus (T2DM) | <ul style="list-style-type: none"><li>- A self-reported diagnosis and/or the use of glucose-lowering agents. Patients who reported new-onset T2DM were sent an additional questionnaire for confirmation and detailed information of the diagnosis, including the date of diagnosis, initial and current treatment, and family history of diabetes.</li></ul>                                                                                                                                     |

**Supplementary Table 3 – Additive effect of presence of rs2281279 (G allele) on metabolic parameters with cut-off 0.05 (n=3930)**

|                                 | <b>Beta (95% CI)</b>    |
|---------------------------------|-------------------------|
| <b>(log)Triglycerides</b>       | 0.002 (-0.010 - 0.015)  |
| <b>Non-HDL-cholesterol</b>      | 0.012 (-0.060 - 0.083)  |
| <b>(log)Insulin<sup>a</sup></b> | -0.011 (-0.031 - 0.008) |
| <b>QUICKI<sup>a</sup></b>       | 0.002 (-0.001 - 0.004)  |

HDL; high-density lipoprotein, QUICKI; quantitative insulin sensitivity check index, CI; confidence interval.

<sup>a</sup> n=2202.

Model adjusted for age + sex.

**Supplementary Table 4 – Additive effect of presence of rs2281279 (G allele) on vascular events and T2DM with cut-off 0.05**

|                              | <b>Number of patients</b> | <b>Number of events (%)</b> | <b>HR (95% CI)</b> |
|------------------------------|---------------------------|-----------------------------|--------------------|
| <b>Cardiovascular events</b> | 3930                      | 933 (24%)                   | 1.07 (0.97 – 1.19) |
| <b>Limb events</b>           | 3930                      | 281 (7%)                    | 0.96 (0.79 – 1.16) |
| <b>T2DM</b>                  | 2945                      | 357 (12%)                   | 1.08 (0.92 – 1.28) |

T2DM; type 2 diabetes mellitus HR; hazard ratio, CI; confidence interval.

Model adjusted for age + sex.

**Supplementary Table 5 – Additive effect of rs2281279 (G allele) on metabolic parameters, stratified for T2DM status at baseline (n=4386)**

|                                 | <b>In patients without T2DM<br/>(n=3668)</b> | <b>In patients with T2DM<br/>(n=718)</b> | <b>P-value for<br/>interaction</b> |
|---------------------------------|----------------------------------------------|------------------------------------------|------------------------------------|
|                                 | <b>Beta (95% CI)</b>                         | <b>Beta (95% CI)</b>                     |                                    |
| <b>(log)Triglycerides</b>       | 0.010 (-0.002 – 0.023)                       | -0.020 (-0.051 – 0.011)                  | 0.04                               |
| <b>Non-HDL-cholesterol</b>      | 0.022 (-0.049 – 0.094)                       | -0.019 (-0.198 – 0.159)                  | 0.52                               |
| <b>(log)Insulin<sup>a</sup></b> | -0.007 (-0.027 – 0.013)                      | -0.011 (-0.056 – 0.033)                  | 0.88                               |
| <b>QUICKI<sup>a</sup></b>       | 0.001 (-0.002 – 0.003)                       | 0.002 (-0.003 – 0.008)                   | 0.74                               |
| <b>(log)HOMA-IR<sup>a</sup></b> | 0.009 (-0.032 – 0.014)                       | NA                                       | NA                                 |

T2DM; type 2 diabetes mellitus, HDL; high-density lipoprotein, QUICKI; quantitative insulin sensitivity check index, HOMA-IR; Homeostatic Model Assessment for Insulin Resistance, CI; confidence interval.

<sup>a</sup> Patients without T2DM (n=2063) and patients with T2DM (n=404)

Model adjusted for age + sex

**Supplementary Table 6 – Triglyceride levels according to T2DM status and rs2281279 genotype**

| <b>No T2DM (n=3668)</b> | <b>Triglycerides (IQR) in mmol/L</b> |
|-------------------------|--------------------------------------|
| Total                   | 1.40 (1.00 – 2.01)                   |
| AA (n=2029)             | 1.35 (1.00 – 2.00)                   |
| AG (n=1381)             | 1.40 (0.98 – 2.06)                   |
| GG (n=258)              | 1.40 (1.00 – 2.30)                   |

  

| <b>T2DM (n=718)</b> | <b>Triglycerides (IQR) in mmol/L</b> |
|---------------------|--------------------------------------|
| Total               | 1.70 (1.19 – 2.46)                   |
| AA (n=409)          | 1.70 (1.18 – 2.60)                   |
| AG (n=261)          | 1.69 (1.19 – 2.35)                   |
| GG (n=48)           | 1.74 (1.28 – 2.33)                   |

**Supplementary Table 7 – Additive effect of presence of rs2281279 (G allele) on vascular events, stratified for T2DM status at baseline (n=4386)**

|                              | In patients without T2DM<br>(n=3668) |                    | In patients with T2DM<br>(n=718) |                    | P-value for<br>interaction |
|------------------------------|--------------------------------------|--------------------|----------------------------------|--------------------|----------------------------|
|                              | Number of<br>events (%)              | HR (95% CI)        | Number of<br>events (%)          | HR (95% CI)        |                            |
| <b>Cardiovascular events</b> | 802 (22%)                            | 1.00 (0.90 – 1.12) | 224 (31%)                        | 1.16 (0.94 – 1.42) | 0.25                       |
| <b>Limb events</b>           | 237 (6%)                             | 0.93 (0.76 – 1.15) | 83 (12%)                         | 0.89 (0.62 – 1.27) | 0.85                       |

HR; hazard ratio; CI; confidence interval.

Model adjusted for age + sex.

**Supplementary Table 8 – Baseline characteristics, stratified for *SULF2* and *APOE* genotype**

|                                      | <b>SULF2 AA + ε2ε2<br/>(n=29)</b> | <b>SULF2 GG + ε2ε2<br/>(n=4)</b>           | <b>SULF2 AA + ε3ε3<br/>(n=1318)</b> | <b>SULF2 GG + ε3ε3<br/>(n=166)</b> |
|--------------------------------------|-----------------------------------|--------------------------------------------|-------------------------------------|------------------------------------|
|                                      | HSPG – / LDLR –<br>FD model       | HSPG + / LDLR –<br>'Healthy' ε2ε2<br>model | HSPG – / LDLR +<br>Decreased HSPG   | HSPG + / LDLR +<br>Healthy model   |
| Male sex (n, %)                      | 18 (62%)                          | 3 (75%)                                    | 907 (69%)                           | 116 (70%)                          |
| Age                                  | 56.8 ± 14.5                       | 52.7 ± 20.7                                | 58.1 ± 12.3                         | 58.5 ± 11.6                        |
| Vascular disease (n,%)               | 20 (69%)                          | 2 (50%)                                    | 989 (75%)                           | 128 (77%)                          |
| Diabetes mellitus type 2 (n, %)      | 4 (14%)                           | 0 (0%)                                     | 221 (17%)                           | 34 (20%)                           |
| <i>Medication use</i>                |                                   |                                            |                                     |                                    |
| - Lipid lowering treatment           | 20 (69%)                          | 1 (25%)                                    | 744 (56%)                           | 95 (57%)                           |
| - Statins                            | 20 (69%)                          | 1 (25%)                                    | 732 (56%)                           | 95 (57%)                           |
| - High intensity statins             | 1 (3%)                            | 0 (0%)                                     | 69 (5%)                             | 10 (6%)                            |
| - Fibrates                           | 0 (0%)                            | 0 (0%)                                     | 30 (2%)                             | 4 (2%)                             |
| - Ezetimibe                          | 1 (3%)                            | 0 (0%)                                     | 37 (3%)                             | 2 (1%)                             |
| - Bile acid sequestrant              | 0 (0%)                            | 0 (0%)                                     | 0 (0%)                              | 0 (0%)                             |
| Current smoking                      | 11 (38%)                          | 1 (25%)                                    | 403 (31%)                           | 51 (31%)                           |
| Current alcohol consumption          | 9 (31%)                           | 1 (25%)                                    | 646 (49%)                           | 77 (46%)                           |
| Body Mass Index (kg/m <sup>2</sup> ) | 28.3 ± 5.5                        | 32.0 ± 12.9                                | 26.9 ± 4.23                         | 26.9 ± 4.3                         |
| Waist circumference (cm)             | 98 ± 14                           | 95 ± 22                                    | 95 ± 12                             | 95 ± 12                            |
| Waist-to-hip ratio                   | 0.93 ± 0.11                       | 0.85 ± 0.07                                | 0.91 ± 0.08                         | 0.92 ± 0.09                        |
| Metabolic syndrome                   | 17 (59%)                          | 2 (50%)                                    | 684 (52%)                           | 93 (56%)                           |
| Systolic blood pressure (mmHg)       | 149 ± 22                          | 135 ± 6                                    | 141 ± 21                            | 141 ± 21                           |
| Diastolic blood pressure (mmHg)      | 86 ± 12                           | 76 ± 12                                    | 82 ± 12                             | 83 ± 11                            |
| <i>Laboratory values</i>             |                                   |                                            |                                     |                                    |
| - Total cholesterol (mmol/L)         | 6.20 ± 3.52                       | 4.78 ± 1.58                                | 5.15 ± 1.42                         | 5.26 ± 1.37                        |
| - HDL-cholesterol (mmol/L)           | 1.39 ± 0.53                       | 1.16 ± 0.12                                | 1.24 ± 0.39                         | 1.21 ± 0.35                        |
| - Non-HDL-cholesterol (mmol/L)       | 4.81 ± 3.62                       | 3.62 ± 1.69                                | 3.92 ± 1.42                         | 4.05 ± 1.35                        |
| - Apolipoprotein B (g/L)             | 0.52 ± 0.16                       | 0.67 ± 0.11                                | 0.90 ± 0.28                         | 0.94 ± 0.28                        |
| - LDL-cholesterol (mmol/L)           | 3.01 ± 2.00                       | 2.62 ± 1.59                                | 3.15 ± 1.20                         | 3.24 ± 1.23                        |
| - Triglycerides (mmol/L)             | 2.48 (1.75 - 4.11)                | 2.31 (1.85 - 2.68)                         | 1.35 (1.00 - 2.00)                  | 1.49 (1.04 - 2.31)                 |
| - Glucose (mmol/L)                   | 6.8 ± 3.4                         | 6.0 ± 0.57                                 | 6.3 ± 2.1                           | 6.6 ± 2.1                          |

HDL; high-density lipoprotein, LDL; low-density lipoprotein.
